# Supplementary material
Source: PubMed Central journal article supplement (PMC2773089)
Supplement: pp.109.143842_1.pdf [file pp.109.143842_1.pdf]

## Supplemental Figure S1.

**A**

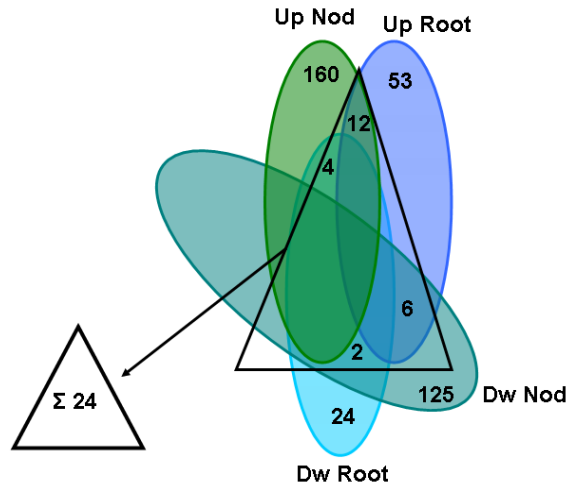

**B**

| EST/TC Identification  | GeneBank Accession No. of EST | Annotation                                              | Nodule Expression ratio -P/+P | Root Expression ratio -P/+P |
|------------------------|-------------------------------|---------------------------------------------------------|-------------------------------|-----------------------------|
| <b>Up Nod, Up Root</b> |                               |                                                         |                               |                             |
| RTS_103_G05/TC5687     | CV541336                      | Q8LPQ8 Monosaccharide-sensing protein 2                 | 4.85                          | 2                           |
| RTS_122_G12/TC6630     | CV542619                      | Q56YU0 Aldehyde dehydrogenase family 2 member C4        | 4.02                          | 3.48                        |
| TC3799                 | -----                         | P14009 14 kDa proline-rich protein DC2.15               | 2.8                           | 2.43                        |
| RTS_119_D05/TC3380     | CV542360                      | Q4U0Y4 Nucleosome assembly protein 1-like 1-A           | 2.73                          | 3.09                        |
| RTS_142_A06/TC4562     | CV543967                      | Q9SK39 Putative steroid-binding protein 3               | 2.6                           | 2.34                        |
| TC3033                 | -----                         | P25985 Pathogenesis-related protein 1                   | 2.41                          | 3                           |
| TC5870                 | -----                         | Q5J907 Translationally-controlled tumor protein homolog | 2.34                          | 3.72                        |
| RTS_121_B11/TC4498     | CV542500                      | O60176 Uncharacterized RNA-binding protein              | 2.2                           | 3.21                        |
| RTS_123_H06            | CV542691                      | P46302 40S ribosomal protein S28                        | 2.16                          | 2.2                         |
| RTS_101_B01/TC2965     | CV541126                      | Q96552 S-adenosylmethionine synthetase 2                | 2.13                          | 2                           |
| RTS_123_C03/TC4497     | CV542648                      | Q6UNT2 60S ribosomal protein L5                         | 2.11                          | 2.17                        |
| RTS_104_E06            | CV541391                      | Q2HRE0 C2                                               | 2.01                          | 6.18                        |
| <b>Up Nod, Dw Root</b> |                               |                                                         |                               |                             |
| TC4262                 | -----                         | Q43291 60S ribosomal protein L21-1                      | 3.04                          | -2.15                       |
| RTS_132_A02            | EH791093                      | Q9ZVM9 Putative serine/threonine-protein kinase         | 3.04                          | -2.29                       |
| RTS_143_D10            | CV544078                      | O74326 Poly(A) RNA polymerase cid11                     | 2.15                          | -2.76                       |
| RTS_140_E05/TC3478     | CV543867                      | P31167 ADP,ATP carrier protein 1, mitochondrial         | 2.02                          | -2.43                       |
| <b>Dw Nod, Up Root</b> |                               |                                                         |                               |                             |
| TC4133                 | -----                         | Q9M1G9 Extensin 2                                       | -5.59                         | 2.4                         |
| TC6344                 | -----                         | Q5DTI8 Extended synaptotagmin-3                         | -4.06                         | 2.51                        |
| RTS_102_F11/TC5055     | CV541259                      | Q8LCS8 Membrane-anchored ubiquitin-fold protein 2       | -3.1                          | 2.3                         |
| RTS_101_C10/TC3943     | CV541144                      | P31239 1-aminocyclopropane-1-carboxylate oxidase        | -2.91                         | 3.59                        |
| TC6005                 | -----                         | Q9FG34 Peroxidase 54                                    | -2.73                         | 2.31                        |
| RTS_123_D12/TC4537     | CV542660                      | P87216 Protein vip1                                     | -2.5                          | 2                           |
| <b>Dw Nod, Dw Root</b> |                               |                                                         |                               |                             |
| TC7398                 | -----                         | Q9M4D8 S-adenosylmethionine decarboxylase proenzyme     | -2.65                         | -2.82                       |
| TC6495                 | -----                         | Q6S4P4 Transcription factor RF2b                        | -2.66                         | -2.76                       |

**Supplemental Figure S1.** Differentially expressed genes common to roots and nodules from P-deficient bean plants. Gene expression was quantified by macroarray analyses from bean roots (Hernández et al., 2007) or nodules (Tables SI and SII) under P deficiency. A. Flower diagram showing the number of genes that are up regulated in nodules (Up Nod) or roots (Up Root) or down regulated (Dw) in each organ. B. List of differentially expressed genes (24) common to nodule and root.
